# Supplementary material for: Budget Impact Analysis of Expanding Gliflozin Coverage in the CKD Population: A French Perspective
Source: Springer Nature journal article supplement (doi:10.1007/s12325-023-02574-2), 2023-06-21
Supplement: MOESM1 [file 12325_2023_2574_MOESM1_ESM.pdf]

## SUPPLEMENTARY MATERIALS

**Title:** Budget impact analysis of expanding gliflozin coverage in the CKD population: a French perspective

**Authors:** Gérard de Pouvourville,<sup>1</sup> Patrick Rossignol,<sup>2,3</sup> Meriem Boussahoua,<sup>4</sup> Julie Chevalier,<sup>4</sup> Peter D. Gabb,<sup>5</sup> Roch Poulmais,<sup>6</sup> Dorian Verboux,<sup>6,7</sup> Naveen Rao,<sup>8</sup> Elisabeth Sörstadius,<sup>9</sup> Juan Jose Garcia Sanchez<sup>8</sup>

*(1) ESSEC Business School, Cergy Pontoise, France, (2) Université de Lorraine, INSERM CIC Plurithématique 1433, Nancy CHRU, Inserm U1116, FCRIN INI-CRCT, Nancy, France, (3) Princess Grace Hospital, Monaco, (4) Vyo Agency, Paris, France, (5) Health Economics and Outcomes Research Ltd., Cardiff, United Kingdom, (6) AstraZeneca, Paris, France, (7) Laboratoire ERUDITE, Université Paris-Est Créteil, Créteil, France, (8) Global Market Access and Pricing, BioPharmaceuticals, AstraZeneca, Cambridge, UK, (9) Global Market Access and Pricing, AstraZeneca, Gothenburg, Sweden*

**Corresponding author:** Juan Jose Garcia Sanchez

Email: [juanjose.garciasanchez@astrazeneca.com](mailto:juanjose.garciasanchez@astrazeneca.com)

## Figures

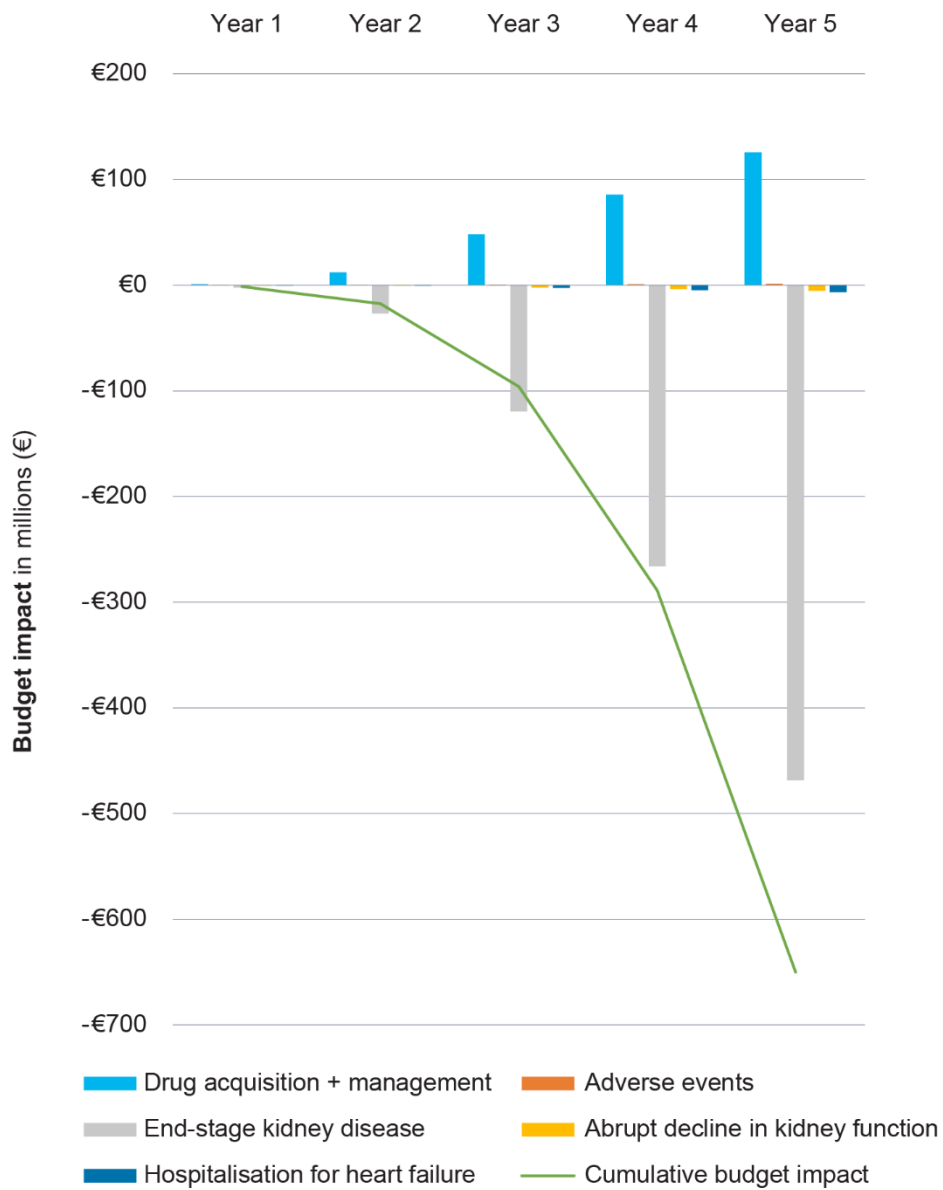

**Figure S1. Five year budget impact outcomes in the central scenario with gliflozins versus the central scenario without gliflozins**

Cumulative budget impact outcomes are illustrated by the green line. Total annual costs are presented according to cost category. Negative values indicate that the scenario with gliflozins has lower costs than the scenario without gliflozins.

## Tables

*Table S1. Market shares of the modelled 10-year scenario analyses*

|                                                 | Year 1  | Year 2  | Year 3  | Year 4  | Year 5  | Year 6  | Year 7  | Year 8  | Year 9  | Year 10   |
|-------------------------------------------------|---------|---------|---------|---------|---------|---------|---------|---------|---------|-----------|
| <b>Lower scenario of public health action</b>   |         |         |         |         |         |         |         |         |         |           |
| <b>World without gliflozin</b>                  |         |         |         |         |         |         |         |         |         |           |
| Standard therapy                                | 379,000 | 380,445 | 381,860 | 383,249 | 384,615 | 385,963 | 387,296 | 388,617 | 389,928 | 391,229   |
| <b>World with gliflozins</b>                    |         |         |         |         |         |         |         |         |         |           |
| Gliflozins + standard therapy                   | 758     | 11,413  | 64,916  | 99,645  | 123,077 | 135,087 | 143,299 | 155,447 | 179,367 | 203,439   |
| Standard therapy                                | 378,242 | 369,031 | 316,944 | 283,604 | 261,538 | 250,876 | 243,996 | 233,170 | 210,561 | 187,790   |
| <b>Central scenario of public health action</b> |         |         |         |         |         |         |         |         |         |           |
| <b>World without gliflozin</b>                  |         |         |         |         |         |         |         |         |         |           |
| Standard therapy                                | 379,000 | 416,689 | 479,318 | 553,917 | 641,746 | 705,921 | 737,687 | 763,506 | 776,486 | 781,921   |
| <b>World with gliflozins</b>                    |         |         |         |         |         |         |         |         |         |           |
| Gliflozins + standard therapy                   | 2,143   | 26,772  | 105,859 | 187,925 | 275,951 | 340,254 | 387,286 | 419,928 | 446,479 | 466,025   |
| Standard therapy                                | 376,857 | 389,917 | 373,459 | 365,992 | 365,795 | 365,667 | 350,401 | 343,578 | 330,006 | 315,896   |
| <b>Upper scenario of public health action</b>   |         |         |         |         |         |         |         |         |         |           |
| <b>World without gliflozin</b>                  |         |         |         |         |         |         |         |         |         |           |
| Standard therapy                                | 379,000 | 462,450 | 543,621 | 640,536 | 754,748 | 813,781 | 870,556 | 929,265 | 992,217 | 1,059,746 |
| <b>World with gliflozins</b>                    |         |         |         |         |         |         |         |         |         |           |
| Gliflozins + standard therapy                   | 4,704   | 104,282 | 249,957 | 405,844 | 555,344 | 650,618 | 734,314 | 812,456 | 889,225 | 966,700   |
| Standard therapy                                | 374,296 | 358,214 | 293,610 | 234,692 | 199,404 | 163,163 | 136,242 | 116,809 | 102,893 | 93,046    |

**Table S2. Incremental clinical outcomes of lower and upper scenarios of public health action over a 10-year horizon**

|                                                 | Year 1 | Year 2 | Year 3 | Year 4 | Year 5  | Year 6  | Year 7  | Year 8  | Year 9  | Year 10 | Cumulative |
|-------------------------------------------------|--------|--------|--------|--------|---------|---------|---------|---------|---------|---------|------------|
| <b>Clinical outcomes (no. events avoided)</b>   |        |        |        |        |         |         |         |         |         |         |            |
| <b>Lower scenario of public health action</b>   |        |        |        |        |         |         |         |         |         |         |            |
| ≥50% sustained decline in eGFR                  | -16    | -242   | -1,375 | -2,111 | -2,608  | -2,862  | -3,036  | -3,294  | -3,800  | -4,310  | -23,655    |
| End-stage kidney disease                        | -10    | -144   | -817   | -1,254 | -1,549  | -1,701  | -1,804  | -1,957  | -2,258  | -2,561  | -14,055    |
| <i>Dialysis</i>                                 | -6     | -89    | -505   | -775   | -958    | -1,051  | -1,115  | -1,209  | -1,395  | -1,583  | -8,686     |
| <i>Transplant</i>                               | -4     | -55    | -312   | -479   | -592    | -650    | -689    | -748    | -863    | -978    | -5,369     |
| Hospitalisation for heart failure               | -6     | -90    | -513   | -787   | -972    | -1,067  | -1,132  | -1,228  | -1,417  | -1,607  | -8,819     |
| Abrupt decline in kidney function               | -4     | -67    | -383   | -587   | -726    | -796    | -845    | -916    | -1,057  | -1,199  | -6,581     |
| All-cause mortality                             | -4     | -58    | -332   | -509   | -629    | -690    | -732    | -794    | -916    | -1,039  | -5,703     |
| <b>Central scenario of public health action</b> |        |        |        |        |         |         |         |         |         |         |            |
| ≥50% sustained decline in eGFR                  | -45    | -567   | -2,243 | -3,982 | -5,847  | -7,209  | -8,206  | -8,897  | -9,460  | -9,874  | -56,329    |
| End-stage kidney disease                        | -27    | -337   | -1,333 | -2,366 | -3,474  | -4,283  | -4,875  | -5,286  | -5,621  | -5,867  | -33,468    |
| <i>Dialysis</i>                                 | -17    | -208   | -824   | -1,462 | -2,147  | -2,647  | -3,013  | -3,267  | -3,474  | -3,626  | -20,683    |
| <i>Transplant</i>                               | -10    | -129   | -509   | -904   | -1,327  | -1,636  | -1,862  | -2,019  | -2,147  | -2,241  | -12,785    |
| Hospitalisation for heart failure               | -17    | -211   | -836   | -1,484 | -2,180  | -2,688  | -3,059  | -3,317  | -3,527  | -3,681  | -21,001    |
| Abrupt decline in kidney function               | -13    | -158   | -624   | -1,108 | -1,627  | -2,006  | -2,283  | -2,475  | -2,632  | -2,747  | -15,672    |
| All-cause mortality                             | -11    | -137   | -541   | -960   | -1,410  | -1,738  | -1,978  | -2,145  | -2,281  | -2,380  | -13,580    |
| <b>Upper scenario of public health action</b>   |        |        |        |        |         |         |         |         |         |         |            |
| ≥50% sustained decline in eGFR                  | -100   | -2,209 | -5,296 | -8,599 | -11,766 | -13,785 | -15,558 | -17,213 | -18,841 | -20,482 | -113,849   |
| End-stage kidney disease                        | -59    | -1,313 | -3,147 | -5,109 | -6,991  | -8,191  | -9,244  | -10,227 | -11,194 | -12,170 | -67,644    |
| <i>Dialysis</i>                                 | -37    | -811   | -1,945 | -3,157 | -4,320  | -5,062  | -5,713  | -6,320  | -6,918  | -7,521  | -41,804    |
| <i>Transplant</i>                               | -23    | -501   | -1,202 | -1,952 | -2,671  | -3,129  | -3,531  | -3,907  | -4,276  | -4,649  | -25,840    |
| Hospitalisation for heart failure               | -37    | -824   | -1,974 | -3,206 | -4,387  | -5,140  | -5,800  | -6,418  | -7,024  | -7,636  | -42,446    |
| Abrupt decline in kidney function               | -28    | -615   | -1,473 | -2,392 | -3,274  | -3,835  | -4,329  | -4,789  | -5,242  | -5,699  | -31,676    |
| All-cause mortality                             | -24    | -533   | -1,277 | -2,073 | -2,837  | -3,323  | -3,751  | -4,150  | -4,542  | -4,938  | -27,447    |

**Table S3. Deterministic sensitivity analysis outcomes**

| Scenario                                                     | Lower limit            |                     |                   | Upper limit            |                     |                   |
|--------------------------------------------------------------|------------------------|---------------------|-------------------|------------------------|---------------------|-------------------|
|                                                              | Without gliflozins (€) | With gliflozins (€) | Budget impact (€) | Without gliflozins (€) | With gliflozins (€) | Budget impact (€) |
| Base case                                                    | 5,776,072,252          | 5,414,876,931       | -650,139,246      | NA                     | NA                  | NA                |
| <b>Event rates (±20%)</b>                                    |                        |                     |                   |                        |                     |                   |
| Gliflozins; ESKD; prior to ESKD                              | 5,776,072,252          | 5,229,487,405       | -997,814,425      | 5,776,072,252          | 5,599,342,454       | -304,196,919      |
| Gliflozins; hospitalisation for heart failure; prior to ESKD | 5,776,072,252          | 5,413,585,052       | -652,941,856      | 5,776,072,252          | 5,416,166,745       | -647,341,113      |
| Gliflozins; abrupt decline in kidney function; prior to ESKD | 5,776,072,252          | 5,412,452,784       | -655,398,207      | 5,776,072,252          | 5,417,294,304       | -644,894,978      |
| Gliflozins; all-cause mortality; prior to ESKD               | 5,776,072,252          | 5,411,358,255       | -660,078,545      | 5,776,072,252          | 5,418,392,846       | -640,228,344      |
| Placebo; ESKD; prior to ESKD                                 | 4,737,656,067          | 4,653,150,701       | -130,396,214      | 6,806,631,751          | 6,170,839,918       | -1,165,949,887    |
| Placebo; hospitalisation for heart failure; prior to ESKD    | 5,770,183,592          | 5,411,520,394       | -644,646,036      | 5,781,942,113          | 5,418,222,751       | -655,614,917      |
| Placebo; abrupt decline in kidney function; prior to ESKD    | 5,768,165,340          | 5,410,369,990       | -642,763,319      | 5,783,947,622          | 5,419,365,892       | -657,485,747      |
| Placebo; all-cause mortality; prior to ESKD                  | 5,809,087,208          | 5,450,571,573       | -639,506,351      | 5,743,947,768          | 5,380,052,232       | -660,750,984      |
| Gliflozins; hospitalisation for heart failure; post-ESKD     | 5,776,072,252          | 5,414,844,249       | -650,210,145      | 5,776,072,252          | 5,414,909,560       | -650,068,460      |
| Gliflozins; abrupt decline in kidney function; post-ESKD     | 5,776,072,252          | 5,414,815,606       | -650,272,285      | 5,776,072,252          | 5,414,938,084       | -650,006,578      |
| Gliflozins; all-cause mortality; post-ESKD                   | 5,776,072,252          | 5,414,710,959       | -650,499,305      | 5,776,072,252          | 5,415,042,174       | -649,780,765      |
| Placebo; hospitalisation for heart failure; post-ESKD        | 5,775,844,336          | 5,414,747,019       | -649,926,635      | 5,776,299,441          | 5,415,006,428       | -650,351,177      |
| Placebo; abrupt decline in kidney function; post-ESKD        | 5,775,766,222          | 5,414,702,493       | -649,853,766      | 5,776,377,062          | 5,415,050,672       | -650,423,586      |
| Placebo; all-cause mortality; post-ESKD                      | 5,775,257,499          | 5,414,412,521       | -649,379,206      | 5,776,881,974          | 5,415,338,472       | -650,894,590      |
| <b>Adverse event rates (±20%)</b>                            |                        |                     |                   |                        |                     |                   |
| Gliflozins; volume depletion rate                            | 5,776,072,252          | 5,414,621,090       | -650,694,268      | 5,776,072,252          | 5,415,132,771       | -649,584,223      |
| Gliflozins; major hypoglycaemia rate                         | 5,776,072,252          | 5,414,737,403       | -650,441,938      | 5,776,072,252          | 5,415,016,458       | -649,836,553      |
| Gliflozins; fracture rate                                    | 5,776,072,252          | 5,414,482,310       | -650,995,338      | 5,776,072,252          | 5,415,271,551       | -649,283,153      |
| Gliflozins; diabetic ketoacidosis rate*                      | 5,776,072,252          | 5,414,876,931       | -650,139,246      | 5,776,072,252          | 5,414,876,931       | -650,139,246      |
| Gliflozins; amputation rate                                  | 5,776,072,252          | 5,412,529,606       | -655,231,550      | 5,776,072,252          | 5,417,224,256       | -645,046,941      |
| Placebo; volume depletion rate                               | 5,775,171,813          | 5,414,363,680       | -649,299,275      | 5,776,972,692          | 5,415,390,181       | -650,979,216      |
| Placebo; major hypoglycaemia rate                            | 5,775,599,368          | 5,414,607,387       | -649,698,117      | 5,776,545,137          | 5,415,146,475       | -650,580,374      |
| Placebo; fracture rate                                       | 5,775,516,701          | 5,414,560,266       | -649,621,002      | 5,776,627,804          | 5,415,193,595       | -650,657,489      |
| Placebo; diabetic ketoacidosis rate*                         | 5,776,003,316          | 5,414,837,637       | -650,074,938      | 5,776,141,189          | 5,414,916,225       | -650,203,553      |
| Placebo; amputation rate                                     | 5,771,411,925          | 5,412,220,544       | -645,791,881      | 5,780,732,580          | 5,417,533,317       | -654,486,610      |
| <b>Event costs (±20%)</b>                                    |                        |                     |                   |                        |                     |                   |
| Dialysis; prior to ESKD                                      | 5,540,874,248          | 5,213,846,476       | -576,015,904      | 6,011,270,257          | 5,615,907,385       | -724,262,587      |
| Transplant; prior to ESKD                                    | 5,650,328,641          | 5,307,400,274       | -610,510,778      | 5,901,815,863          | 5,522,353,588       | -689,767,713      |
| Hospitalisation for heart failure; prior to ESKD             | 5,770,145,749          | 5,410,202,804       | -647,422,329      | 5,781,998,756          | 5,419,551,057       | -652,856,162      |
| Abrupt decline in kidney function; prior to ESKD             | 5,768,101,747          | 5,407,895,973       | -647,992,513      | 5,784,042,758          | 5,421,857,888       | -652,285,978      |
| All-cause mortality; prior to ESKD                           | 5,767,226,171          | 5,407,535,870       | -646,874,241      | 5,784,918,334          | 5,422,217,991       | -653,404,250      |
| Hospitalisation for heart failure; post-ESKD                 | 5,775,842,872          | 5,414,713,398       | -649,996,395      | 5,776,301,633          | 5,415,040,464       | -650,282,096      |

| Scenario                                     | Lower limit            |                     |                   | Upper limit            |                     |                   |
|----------------------------------------------|------------------------|---------------------|-------------------|------------------------|---------------------|-------------------|
|                                              | Without gliflozins (€) | With gliflozins (€) | Budget impact (€) | Without gliflozins (€) | With gliflozins (€) | Budget impact (€) |
| Abrupt decline in kidney function; post-ESKD | 5,775,763,760          | 5,414,639,421       | -649,985,257      | 5,776,380,745          | 5,415,114,441       | -650,293,234      |
| All-cause mortality; post-ESKD               | 5,775,729,872          | 5,414,623,620       | -649,946,017      | 5,776,414,633          | 5,415,130,242       | -650,332,474      |
| Dialysis (maintenance); prior to ESKD        | 5,156,027,596          | 4,831,717,252       | -593,984,466      | 6,396,116,909          | 5,998,036,609       | -706,294,025      |
| Transplant (maintenance); prior to ESKD      | 5,702,687,997          | 5,345,858,130       | -643,493,149      | 5,849,456,508          | 5,483,895,732       | -656,785,342      |
| Volume depletion cost                        | 5,775,171,813          | 5,414,107,840       | -649,854,297      | 5,776,972,692          | 5,415,646,022       | -650,424,194      |
| Major hypoglycaemia cost                     | 5,775,599,368          | 5,414,467,859       | -650,000,810      | 5,776,545,137          | 5,415,286,003       | -650,277,681      |
| Fracture cost                                | 5,775,516,701          | 5,414,165,646       | -650,477,094      | 5,776,627,804          | 5,415,588,216       | -649,801,397      |
| Diabetic ketoacidosis cost                   | 5,776,003,316          | 5,414,837,637       | -650,074,938      | 5,776,141,189          | 5,414,916,225       | -650,203,553      |
| Amputation cost                              | 5,771,411,925          | 5,409,873,219       | -650,884,186      | 5,780,732,580          | 5,419,880,642       | -649,394,305      |

*ESKD: end-stage kidney disease*

*Note: negative values indicate the budget savings in the “world with gliflozins” scenario versus the “world without gliflozins” scenario.*
